# Supplementary material
Source: ML conference proceedings conference paper supplement (https://openaccess.thecvf.com/content/CVPR_2019/html/Roy_Mitigating_Information_Leakage_CVPR_2019_paper.html)
Supplement: Supplementary file 1 [file Roy_Mitigating_Information_Leakage_CVPR_2019_supplemental.pdf]

# Mitigating Information Leakage in Image Representations: A Maximum Entropy Approach (supplementary Material)

Proteek Chandan Roy and Vishnu Naresh Boddeti  
Department of Computer Science and Engineering  
Michigan State University, East Lansing MI 48824  
{royprote, vishnu}@msu.edu

In this supplementary material we include proof of Theorem 1 in Section 1, Corollary 1.1 in Section 2 and finally provide the numerical values of the trade-off fronts in the CIFAR-10 and CIFAR-100 experiment in Section 3.

## 1. Proof of Theorem 1

**Theorem 1.** Given a fixed encoder  $E$ , the optimal discriminator is  $q_D(s|E(\mathbf{x}; \boldsymbol{\theta}_E); \boldsymbol{\theta}_D^*) = p(s|E(\mathbf{x}; \boldsymbol{\theta}_E))$  and the optimal predictor is  $q_T(t|E(\mathbf{x}; \boldsymbol{\theta}_E); \boldsymbol{\theta}_T^*) = p(t|E(\mathbf{x}; \boldsymbol{\theta}_E))$ .

*Proof.* Let,  $\mathbf{z}$  be the fixed encoder output from input  $\mathbf{x}$  i.e.  $\mathbf{z} = E(\mathbf{x}; \boldsymbol{\theta}_E)$ . Let,  $p(\mathbf{x}, t, s)$  be the true joint distribution of the variables, i.e. input  $\mathbf{x}$ , target label  $t$  and sensitive label  $s$ . The fixed encoder is a deterministic transformation of  $\mathbf{x}$  and generates an implicit distribution  $p(\mathbf{z}, t, s)$ .

*Discriminator:* The objective of the discriminator is,

$$\begin{aligned} V_1(\boldsymbol{\theta}_E, \boldsymbol{\theta}_D) &= KL(p(s|\mathbf{x}) \| q_D(s|E(\mathbf{x}; \boldsymbol{\theta}_E); \boldsymbol{\theta}_D)) \\ &= \mathbb{E}_{(\mathbf{z}, t, s) \sim p(\mathbf{z}, t, s)} -\log q_D(s|\mathbf{z}; \boldsymbol{\theta}_D) \\ &= -\sum_{\mathbf{x}, t, s} p(\mathbf{x}, t, s) \log q_D(s|\mathbf{z}; \boldsymbol{\theta}_D) \quad (1) \\ \text{s.t. } \sum_s q_D(s|\mathbf{z}; \boldsymbol{\theta}_D) &= 1, \quad \forall \mathbf{z} \\ q_D(s|\mathbf{z}; \boldsymbol{\theta}_D) &\geq 0, \quad \forall \mathbf{z} \end{aligned}$$

The Lagrangian dual of the problem can be written as

$$L = V_1(\boldsymbol{\theta}_E, \boldsymbol{\theta}_D) + \sum_{\mathbf{z}} \lambda(\mathbf{z}) \left( \sum_s q_D(s|\mathbf{z}; \boldsymbol{\theta}_D) - 1 \right)$$

Now we take partial derivative of  $L$  w.r.t.  $q_D(s|\mathbf{z}; \boldsymbol{\theta}_D^*)$ , the distribution of optimal discriminator. Therefore, the opti-

mal discriminator satisfies,

$$\begin{aligned} \frac{\partial L}{\partial q_D(s|\mathbf{z}; \boldsymbol{\theta}_D^*)} &= 0 \\ \Rightarrow -\frac{\sum_t p(\mathbf{z}, t, s)}{q_D(s|\mathbf{z}; \boldsymbol{\theta}_D^*)} + \lambda(\mathbf{z}) &= 0 \quad (2) \\ \Rightarrow \lambda(\mathbf{z}) q_D(s|\mathbf{z}; \boldsymbol{\theta}_D^*) &= p(\mathbf{z}, s) \end{aligned}$$

where we used the fact that,  $\sum_t p(\mathbf{z}, t, s) = p(\mathbf{z}, s)$ . Now summing w.r.t. to variable  $s$  on the both sides of last line and using the fact that  $\sum_s q_D(s|\mathbf{z}; \boldsymbol{\theta}_D^*) = 1$  we get,

$$\lambda(\mathbf{z}) = p(\mathbf{z})$$

By substituting  $\lambda(\mathbf{z})$  we obtain the solution for the optimal discriminator,

$$q_D(s|\mathbf{z}; \boldsymbol{\theta}_D^*) = \frac{p(\mathbf{z}, s)}{p(\mathbf{z})} = p(s|\mathbf{z}) \quad (3)$$

Therefore,

$$q_D(s|E(\mathbf{x}; \boldsymbol{\theta}_E); \boldsymbol{\theta}_D^*) = p(s|E(\mathbf{x}; \boldsymbol{\theta}_E))$$

*Target Predictor:* The objective of the predictor is,

$$\begin{aligned} V_2(\boldsymbol{\theta}_E, \boldsymbol{\theta}_T) &= KL(p(t|\mathbf{x}) \| q_T(t|E(\mathbf{x}; \boldsymbol{\theta}_E); \boldsymbol{\theta}_T)) \\ &= \mathbb{E}_{(\mathbf{z}, t, s) \sim p(\mathbf{z}, t, s)} -\log q_T(t|\mathbf{z}; \boldsymbol{\theta}_T) \\ &= -\sum_{\mathbf{x}, t, s} p(\mathbf{x}, t, s) \log q_T(t|\mathbf{z}; \boldsymbol{\theta}_T) \quad (4) \end{aligned}$$

$$\begin{aligned} \text{s.t. } \sum_t q_T(t|\mathbf{z}; \boldsymbol{\theta}_T) &= 1, \quad \forall \mathbf{z} \\ q_T(t|\mathbf{z}; \boldsymbol{\theta}_T) &\geq 0, \quad \forall \mathbf{z} \end{aligned}$$

The Lagrangian dual of the problem can be written as

$$L = V_2(\boldsymbol{\theta}_E, \boldsymbol{\theta}_T) + \sum_{\mathbf{z}} \lambda(\mathbf{z}) \left( \sum_t q_T(t|\mathbf{z}; \boldsymbol{\theta}_T) - 1 \right)$$

Now we take partial derivative of  $L$  w.r.t.  $q_T(t|\mathbf{z}; \boldsymbol{\theta}_T^*)$ , the distribution of optimal predictor. The optimal predictor satisfies the equation.

$$\begin{aligned} \frac{\partial L}{\partial q_T(t|\mathbf{z}; \boldsymbol{\theta}_T^*)} &= 0 \\ \Rightarrow -\frac{\sum_s p(\mathbf{z}, t, s)}{q_T(t|\mathbf{z}; \boldsymbol{\theta}_T^*)} + \lambda(\mathbf{z}) &= 0 \\ \Rightarrow \lambda(\mathbf{z}) q_T(t|\mathbf{z}; \boldsymbol{\theta}_T^*) &= p(\mathbf{z}, t) \end{aligned} \quad (5)$$

where we used the fact that,  $\sum_s p(\mathbf{z}, t, s) = p(\mathbf{z}, t)$ . Now summing w.r.t. to variable  $t$  on the both sides of last line and using the fact that  $\sum_t q_T(t|\mathbf{z}; \boldsymbol{\theta}_T^*) = 1$  we get,

$$\lambda(\mathbf{z}) = p(\mathbf{z})$$

By substituting  $\lambda(\mathbf{z})$  we obtain the solution of the optimal discriminator

$$q_T(t|\mathbf{z}; \boldsymbol{\theta}_T^*) = \frac{p(\mathbf{z}, t)}{p(\mathbf{z})} = p(t|\mathbf{z}) \quad (6)$$

Therefore,

$$q_T(t|E(\mathbf{x}; \boldsymbol{\theta}_E); \boldsymbol{\theta}_T^*) = p(t|E(\mathbf{x}; \boldsymbol{\theta}_E))$$

□

## 2. Proof of Corollary 1.1

**Corollary 1.1.** When  $s \perp\!\!\!\perp t$ , let the optimum discriminator and predictor for an encoder  $E$  be  $q_D(s|E(\mathbf{x}; \boldsymbol{\theta}_E); \boldsymbol{\theta}_D^*)$  and  $q_T(t|E(\mathbf{x}; \boldsymbol{\theta}_E); \boldsymbol{\theta}_T^*)$  respectively. The optimal encoder  $E(\cdot)$  in the MaxEnt-ARL formulation induces a uniform distribution in the discriminator  $q_D(s|E(\mathbf{x}; \boldsymbol{\theta}_E); \boldsymbol{\theta}_D^*)$  over the classes of the sensitive attribute.

*Proof.* Here we will prove that, when discriminator is fixed, then the encoder learns a representation of data  $\mathbf{x}$  such that  $q_D(s|E(\mathbf{x}; \boldsymbol{\theta}_E); \boldsymbol{\theta}_D^*) = 1/m$ . First we note that although the discriminator is fixed, the discriminator probability  $q_D(s|E(\mathbf{x}; \boldsymbol{\theta}_E); \boldsymbol{\theta}_D^*)$  can change by changing the encoder parameters  $\boldsymbol{\theta}_E$ . Optimization of the encoder in MaxEnt-ARL is formulated as:

$$\begin{aligned} \min V &= \min_{\boldsymbol{\theta}_E} \mathbb{E}_{(\mathbf{x}, t, s) \sim p(\mathbf{x}, t, s)} [-\log q_T(t|E(\mathbf{x}; \boldsymbol{\theta}_E); \boldsymbol{\theta}_T^*)] \\ &+ \alpha \mathbb{E}_{\mathbf{x}} \left[ \sum_{i=1}^m q_D(s_i|E(\mathbf{x}; \boldsymbol{\theta}_E); \boldsymbol{\theta}_D^*) \log q_D(s_i|E(\mathbf{x}; \boldsymbol{\theta}_E); \boldsymbol{\theta}_D^*) \right] \\ &+ \log m \end{aligned}$$

$$\text{s.t. } \sum_{i=1}^m q_D(s_i|E(\mathbf{x}; \boldsymbol{\theta}_E); \boldsymbol{\theta}_D^*) = 1$$

$$q_D(s_i|E(\mathbf{x}; \boldsymbol{\theta}_E); \boldsymbol{\theta}_D^*) \geq 0, \quad \forall i$$

(7)

The Lagrangian dual of the problem can be written as,

$$L = V - \lambda \left( \sum_{i=1}^m q_D(s_i|E(\mathbf{x}; \boldsymbol{\theta}_E); \boldsymbol{\theta}_D^*) - 1 \right)$$

Here  $\lambda$  is a Lagrangian multiplier and is assumed to be a constant in the absence of any further information. Since  $s \perp\!\!\!\perp t$ , we have  $q_T(t|E(\mathbf{x}; \boldsymbol{\theta}_E); \boldsymbol{\theta}_T^*)$  is independent of  $q_D(s|E(\mathbf{x}; \boldsymbol{\theta}_E); \boldsymbol{\theta}_D^*)$  given  $E(\mathbf{x}; \boldsymbol{\theta}_E)$  from Theorem 1. Therefore, if we take derivative of  $L$  w.r.t.  $q_D(s_i|E(\mathbf{x}; \boldsymbol{\theta}_E); \boldsymbol{\theta}_D^*)$  and set it to zero we have:

$$\begin{aligned} \frac{\partial L}{\partial q_D(s_i|E(\mathbf{x}; \boldsymbol{\theta}_E); \boldsymbol{\theta}_D^*)} &= 0 \\ \Rightarrow 1 + \log(q_D(s_i|E(\mathbf{x}; \boldsymbol{\theta}_E); \boldsymbol{\theta}_D^*) - \lambda) &= 0 \\ \Rightarrow q_D(s_i|E(\mathbf{x}; \boldsymbol{\theta}_E); \boldsymbol{\theta}_D^*) &= \exp(\lambda - 1) \end{aligned} \quad (8)$$

Using the first (non-trivial) constraint, we have

$$\sum_{i=1}^m q_D(s_i|E(\mathbf{x}; \boldsymbol{\theta}_E); \boldsymbol{\theta}_D^*) = 1$$

$$\sum_{i=1}^m \exp(\lambda - 1) = 1$$

$$\exp(\lambda - 1) \sum_{i=1}^m 1 = 1$$

$$m(\exp(\lambda - 1)) = 1$$

$$\lambda = \log(1/m) + 1$$

Hence, the probability distribution of the discriminator after the encoder's parameters  $\boldsymbol{\theta}_E$  are optimized is  $q_D(s_i|E(\mathbf{x}; \boldsymbol{\theta}_E); \boldsymbol{\theta}_D^*) = 1/m$ . Thus, when the optimum discriminator parameters are fixed, the encoder optimizes the representation such that the discriminator does not leak any information, i.e., it induces a uniform distribution. □

## 3. CIFAR Trade-Off

We report the numerical values of the target accuracy and adversary accuracy trade-off results on the CIFAR-10 and CIFAR-100 experiments in Table 1 and Table 3, respectively. Similarly, we report the numerical values of the target accuracy and adversary entropy trade-off results on the CIFAR-10 and CIFAR-100 experiments in Table 2 and Table 4, respectively.

|                        |       |       |       |                        |       |       |       |       |       |       |
|------------------------|-------|-------|-------|------------------------|-------|-------|-------|-------|-------|-------|
| Target Accuracy (%)    | 97.75 | 97.73 | 97.68 | Target Accuracy (%)    | 97.52 | 97.44 | 97.35 | 91.52 | 91.15 | 60.00 |
| Adversary Accuracy (%) | 23.44 | 23.09 | 22.68 | Adversary Accuracy (%) | 20.83 | 20.77 | 20.64 | 19.68 | 14.27 | 10.00 |

(a) No Privacy

|                        |       |       |       |       |       |       |       |
|------------------------|-------|-------|-------|-------|-------|-------|-------|
| Target Accuracy (%)    | 97.78 | 97.74 | 97.53 | 96.79 | 95.01 | 92.34 | 61.17 |
| Adversary Accuracy (%) | 23.44 | 22.91 | 21.17 | 21.14 | 19.05 | 12.00 | 10.64 |

(b) ML-ARL

(c) MaxEnt-ARL

Table 1: CIFAR-10: Target Accuracy (%) vs Adversary Accuracy

|                          |       |       |       |                          |       |       |       |       |       |
|--------------------------|-------|-------|-------|--------------------------|-------|-------|-------|-------|-------|
| Target Accuracy (%)      | 97.75 | 97.73 | 97.71 | Target Accuracy (%)      | 97.52 | 97.50 | 96.58 | 95.97 | 60.00 |
| Adversary Entropy (nats) | 1.65  | 1.65  | 1.67  | Adversary Entropy (nats) | 1.65  | 1.66  | 1.80  | 2.16  | 2.30  |

(a) No Privacy

|                          |       |       |       |       |       |       |       |       |       |
|--------------------------|-------|-------|-------|-------|-------|-------|-------|-------|-------|
| Target Accuracy (%)      | 97.78 | 97.74 | 97.58 | 97.53 | 97.14 | 96.79 | 95.76 | 92.34 | 61.17 |
| Adversary Entropy (nats) | 1.65  | 1.66  | 1.78  | 2.11  | 2.26  | 2.26  | 2.27  | 2.27  | 2.29  |

(b) ML-ARL

(c) MaxEnt-ARL

Table 2: CIFAR-10: Target Accuracy (%) vs Adversary Entropy

|                        |       |       |                        |       |       |       |       |       |       |       |      |
|------------------------|-------|-------|------------------------|-------|-------|-------|-------|-------|-------|-------|------|
| Target Accuracy (%)    | 71.99 | 71.56 | Target Accuracy (%)    | 71.32 | 70.52 | 70.43 | 69.98 | 69.42 | 24.66 | 22.22 | 5.00 |
| Adversary Accuracy (%) | 30.69 | 30.59 | Adversary Accuracy (%) | 15.43 | 15.09 | 14.84 | 14.60 | 14.41 | 6.81  | 6.72  | 1.00 |

(a) No Privacy

|                        |       |       |       |       |       |       |       |       |      |      |
|------------------------|-------|-------|-------|-------|-------|-------|-------|-------|------|------|
| Target Accuracy (%)    | 71.17 | 70.80 | 70.50 | 67.63 | 63.81 | 61.98 | 60.03 | 59.11 | 5.37 | 5.00 |
| Adversary Accuracy (%) | 16.88 | 16.60 | 16.43 | 13.23 | 8.38  | 5.02  | 3.80  | 2.81  | 1.23 | 1.00 |

(b) ML-ARL

(c) MaxEnt-ARL

Table 3: CIFAR-100: Target Accuracy (%) vs Adversary Accuracy

|                          |       |                          |       |       |       |       |       |       |      |
|--------------------------|-------|--------------------------|-------|-------|-------|-------|-------|-------|------|
| Target Accuracy (%)      | 71.99 | Target Accuracy (%)      | 71.32 | 64.90 | 56.99 | 54.46 | 24.66 | 22.22 | 5.00 |
| Adversary Entropy (nats) | 2.09  | Adversary Entropy (nats) | 2.50  | 2.51  | 2.68  | 2.88  | 3.77  | 3.88  | 4.60 |

(a) No Privacy

|                          |       |       |       |       |       |       |       |       |       |       |      |      |
|--------------------------|-------|-------|-------|-------|-------|-------|-------|-------|-------|-------|------|------|
| Target Accuracy (%)      | 71.17 | 71.05 | 70.80 | 67.63 | 67.38 | 65.71 | 63.81 | 61.98 | 59.11 | 56.32 | 5.37 | 5.00 |
| Adversary Entropy (nats) | 2.27  | 2.28  | 2.31  | 2.91  | 3.01  | 3.24  | 4.14  | 4.56  | 4.57  | 4.57  | 4.59 | 4.60 |

(b) ML-ARL

(c) MaxEnt-ARL

Table 4: CIFAR-100: Target Accuracy vs Adversary Entropy
